# Supplementary material for: Gender Disparity in the Authorship of Biomedical Research Publications During the COVID-19 Pandemic: Retrospective Observational Study
Source: PubMed Central journal article supplement (PMC8043146; doi:10.2196/25379), 2021-04-12
Supplement: jmir_v23i4e25379_app1.pdf [file jmir_v23i4e25379_app1.pdf]

# Multimedia Appendix for

## Gender disparity in the authorship of biomedical research publications during the COVID-19 pandemic

Goran Murić, Kristina Lerman and Emilio Ferrara

Emilio Ferrara

E-mail: [emiliofe@usc.edu](mailto:emiliofe@usc.edu)

### This PDF file includes:

Figs. S1 to S2

Tables S1 to S11

**Table S1. The complete list of Springer-Nature Journals used for the analysis**

---

| Journals                                        |
|-------------------------------------------------|
| BMC Anesthesiology                              |
| BMC Biochemistry                                |
| BMC Bioinformatics                              |
| BMC Biology                                     |
| BMC Biotechnology                               |
| BMC Cancer                                      |
| BMC Cardiovascular Disorders                    |
| BMC Complementary and Alternative Medicine      |
| BMC Dermatology                                 |
| BMC Developmental Biology                       |
| BMC Ecology                                     |
| BMC Emergency Medicine                          |
| BMC Endocrine Disorders                         |
| BMC Evolutionary Biology                        |
| BMC Family Practice                             |
| BMC Gastroenterology                            |
| BMC Genetics                                    |
| BMC Genomics                                    |
| BMC Geriatrics                                  |
| BMC Health Services Research                    |
| BMC Immunology                                  |
| BMC Infectious Diseases                         |
| BMC International Health and Human Rights       |
| BMC Medical Education                           |
| BMC Medical Ethics                              |
| BMC Medical Genetics                            |
| BMC Medical Genomics                            |
| BMC Medical Imaging                             |
| BMC Medical Informatics and Decision Making     |
| BMC Medical Research Methodology                |
| BMC Medicine                                    |
| BMC Microbiology                                |
| BMC Molecular Biology                           |
| BMC Musculoskeletal Disorders                   |
| BMC Nephrology                                  |
| BMC Neurology                                   |
| BMC Neuroscience                                |
| BMC Nursing                                     |
| BMC Obesity                                     |
| BMC Ophthalmology                               |
| BMC Oral Health                                 |
| BMC Palliative Care                             |
| BMC Pediatrics                                  |
| BMC Plant Biology                               |
| BMC Pregnancy and Childbirth                    |
| BMC Psychiatry                                  |
| BMC Psychology                                  |
| BMC Public Health                               |
| BMC Pulmonary Medicine                          |
| BMC Sports Science, Medicine and Rehabilitation |
| BMC Structural Biology                          |
| BMC Surgery                                     |
| BMC Urology                                     |
| BMC Veterinary Research                         |
| BMC Women's Health                              |
| Nature Biomedical Engineering                   |
| Nature Biotechnology                            |
| Nature Chemistry                                |
| Nature Genetics                                 |
| Nature Immunology                               |
| Nature Medicine                                 |
| Nature Microbiology                             |

---

**Table S2. The list of scientific disciplines within the biomedical fields**

| Discipline                                 | Papers | Authors | Discipline                                           | Papers | Authors |
|--------------------------------------------|--------|---------|------------------------------------------------------|--------|---------|
| 1 Neuroscience                             | 9412   | 39401   | 57 Evolutionary Biology                              | 184    | 765     |
| 2 Microbiology                             | 5354   | 28964   | 58 Palliative Care                                   | 171    | 901     |
| 3 Bioinformatics                           | 4629   | 17754   | 59 Biology                                           | 155    | 1153    |
| 4 Genomics                                 | 3695   | 24051   | 60 Medical Genomics                                  | 143    | 873     |
| 5 Cell-Biology                             | 2896   | 17044   | 61 Emergency Medicine                                | 136    | 672     |
| 6 Evolutionary-Biology                     | 2487   | 9897    | 62 Complementary And Alternative Medicine            | 128    | 515     |
| 7 Ecology                                  | 2380   | 10092   | 63 Medical Imaging                                   | 127    | 539     |
| 8 Genetics                                 | 2369   | 17309   | 64 Psychiatry And Clinical Psychology                | 123    | 830     |
| 9 Biophysics                               | 2183   | 8627    | 65 Psychology                                        | 114    | 526     |
| 10 Biochemistry                            | 1995   | 11158   | 66 Health Informatics                                | 113    | 605     |
| 11 Molecular-Biology                       | 1992   | 11921   | 67 Genetic And Genomic Medicine                      | 111    | 1219    |
| 12 Cancer-Biology                          | 1990   | 16045   | 68 Medical Ethics                                    | 109    | 442     |
| 13 Public Health                           | 1966   | 9428    | 69 Nursing                                           | 101    | 420     |
| 14 Immunology                              | 1936   | 14778   | 70 Biotechnology                                     | 91     | 481     |
| 15 Plant-Biology                           | 1774   | 8711    | 71 Cardiovascular Medicine                           | 81     | 610     |
| 16 Developmental-Biology                   | 1524   | 8266    | 72 Oncology                                          | 79     | 862     |
| 17 Bioengineering                          | 1377   | 6846    | 73 Radiology And Imaging                             | 73     | 518     |
| 18 Epidemiology                            | 1348   | 6864    | 74 Sports Science, Medicine And Rehabilitation       | 71     | 355     |
| 19 Cancer                                  | 1258   | 7881    | 75 Health Policy                                     | 69     | 335     |
| 20 Health Services Research                | 1148   | 5615    | 76 Intensive Care And Critical Care Medicine         | 65     | 605     |
| 21 Systems-Biology                         | 1110   | 5713    | 77 Respiratory Medicine                              | 61     | 615     |
| 22 Infectious Diseases (Except Hiv/Aids)   | 1094   | 10056   | 78 Paleontology                                      | 61     | 276     |
| 23 Infectious Diseases                     | 1005   | 5677    | 79 Occupational And Environmental Health             | 47     | 296     |
| 24 Physiology                              | 859    | 5266    | 80 Health Economics                                  | 36     | 114     |
| 25 Musculoskeletal Disorders               | 811    | 3543    | 81 Health Systems And Quality Improvement            | 35     | 270     |
| 26 Animal-Behavior-And-Cognition           | 770    | 2884    | 82 Clinical-Trials                                   | 30     | 303     |
| 27 Pediatrics                              | 646    | 3253    | 83 Endocrinology (Including Diabetes Mellitus And... | 29     | 220     |
| 28 Plant Biology                           | 642    | 2621    | 84 Allergy And Immunology                            | 28     | 385     |
| 29 Pregnancy And Childbirth                | 620    | 2877    | 85 Dermatology                                       | 27     | 152     |
| 30 Neurology                               | 578    | 3544    | 86 Hiv/Aids                                          | 25     | 190     |
| 31 Pharmacology-And-Toxicology             | 566    | 3324    | 87 Developmental Biology                             | 25     | 103     |
| 32 Psychiatry                              | 538    | 2914    | 88 Nutrition                                         | 23     | 135     |
| 33 Nephrology                              | 530    | 2890    | 89 International Health And Human Rights             | 23     | 121     |
| 34 Veterinary Research                     | 504    | 2641    | 90 Pharmacology And Therapeutics                     | 22     | 158     |
| 35 Cardiovascular Disorders                | 458    | 2339    | 91 Obstetrics And Gynecology                         | 20     | 141     |
| 36 Synthetic-Biology                       | 454    | 2200    | 92 Rehabilitation Medicine And Physical Therapy      | 20     | 129     |
| 37 Medical Education                       | 445    | 2016    | 93 Primary Care Research                             | 17     | 141     |
| 38 Geriatrics                              | 434    | 2334    | 94 Rheumatology                                      | 17     | 120     |
| 39 Ophthalmology                           | 430    | 1446    | 95 Geriatric Medicine                                | 16     | 111     |
| 40 Pathology                               | 384    | 2756    | 96 Hematology                                        | 15     | 174     |
| 41 Gastroenterology                        | 368    | 2093    | 97 Dentistry And Oral Medicine                       | 14     | 66      |
| 42 Scientific-Communication-And-Education  | 359    | 1676    | 98 Sports Medicine                                   | 13     | 73      |
| 43 Public And Global Health                | 348    | 2113    | 99 Addiction Medicine                                | 12     | 87      |
| 44 Oral Health                             | 346    | 1406    | 100 Unknown                                          | 12     | 69      |
| 45 Anesthesiology                          | 320    | 1357    | 101 Sexual And Reproductive Health                   | 10     | 53      |
| 46 Medicine                                | 301    | 4446    | 102 Otolaryngology                                   | 10     | 52      |
| 47 Pulmonary Medicine                      | 289    | 1623    | 103 Pain Medicine                                    | 6      | 34      |
| 48 Surgery                                 | 285    | 1403    | 104 Orthopedics                                      | 6      | 25      |
| 49 Zoology                                 | 272    | 1213    | 105 Toxicology                                       | 5      | 32      |
| 50 Medical Genetics                        | 236    | 1186    | 106 Palliative Medicine                              | 4      | 17      |
| 51 Medical Research Methodology            | 230    | 1143    | 107 Transplantation                                  | 4      | 14      |
| 52 Medical Informatics And Decision Making | 225    | 1110    | 108 Anesthesia                                       | 4      | 11      |
| 53 Women'S Health                          | 223    | 978     | 109 Biomedical Engineering                           | 2      | 42      |
| 54 Family Practice                         | 213    | 1033    | 110 Chemistry                                        | 2      | 22      |
| 55 Endocrine Disorders                     | 210    | 1068    | 111 Molecular Biology                                | 2      | 10      |
| 56 Urology                                 | 193    | 1037    | 112 Obesity                                          | 1      | 7       |

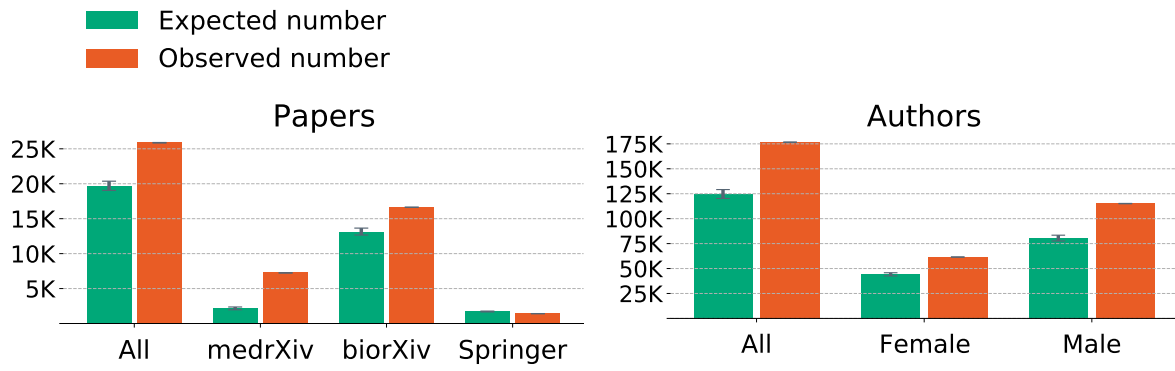

**Fig. S1. Number of papers and authors during the COVID-19 pandemic.** Green bars are the expected numbers and the orange bars are the actual numbers. We observe high influx of papers on preprint servers and drop of submissions to peer-reviewed journals. The number of authors publishing during the pandemic is higher than expected.

**Table S3. The expected and observed proportion of female authors disaggregated by the publisher and the order of authorship**

|                 | order        | papers       | Model           |                 | Observation |                    | % drop  |
|-----------------|--------------|--------------|-----------------|-----------------|-------------|--------------------|---------|
|                 |              |              | $\bar{y}_{est}$ | $\bar{S}_{est}$ | $\bar{y}$   | $\sigma_{\bar{x}}$ |         |
| All publishers  | First        | All          | 0.389           | 0.007           | 0.353       | 0.004              | 9.142   |
|                 |              | COVID-19     | 0.389           | 0.007           | 0.28        | 0.007              | 28.031  |
|                 |              | Non-Covid-19 | 0.389           | 0.007           | 0.38        | 0.004              | 2.372   |
|                 | Last         | All          | 0.257           | 0.005           | 0.236       | 0.003              | 7.961   |
|                 |              | COVID-19     | 0.257           | 0.005           | 0.209       | 0.007              | 18.812  |
|                 |              | Non-Covid-19 | 0.257           | 0.005           | 0.246       | 0.003              | 4.416   |
|                 | Any          | All          | 0.354           | 0.003           | 0.348       | 0.002              | 1.578   |
|                 |              | COVID-19     | 0.354           | 0.003           | 0.341       | 0.009              | 3.53    |
|                 | Solo         | Non-Covid-19 | 0.354           | 0.003           | 0.351       | 0.002              | 0.934   |
| All             |              | 0.21         | 0.03            | 0.137           | 0.008       | 34.586             |         |
| COVID-19        |              | 0.21         | 0.03            | 0.137           | 0.023       | 34.514             |         |
| bioRxiv         | First        | All          | 0.367           | 0.008           | 0.37        | 0.004              | -0.826  |
|                 |              | COVID-19     | 0.367           | 0.008           | 0.32        | 0.011              | 12.671  |
|                 |              | Non-Covid-19 | 0.367           | 0.008           | 0.375       | 0.004              | -2.052  |
|                 | Last         | All          | 0.235           | 0.007           | 0.233       | 0.004              | 0.899   |
|                 |              | COVID-19     | 0.235           | 0.007           | 0.188       | 0.013              | 20.082  |
|                 |              | Non-Covid-19 | 0.235           | 0.007           | 0.238       | 0.004              | -1.065  |
|                 | Any          | All          | 0.342           | 0.003           | 0.344       | 0.002              | -0.596  |
|                 |              | COVID-19     | 0.342           | 0.003           | 0.334       | 0.007              | 2.287   |
|                 |              | Non-Covid-19 | 0.342           | 0.003           | 0.345       | 0.002              | -0.82   |
| Solo            | All          | 0.209        | 0.035           | 0.165           | 0.016       | 21                 |         |
|                 | COVID-19     | 0.209        | 0.035           | -               | -           | -                  |         |
|                 | Non-Covid-19 | 0.209        | 0.035           | 0.175           | 0.018       | 15.996             |         |
| medRxiv         | First        | All          | 0.335           | 0.055           | 0.3         | 0.009              | 10.6    |
|                 |              | COVID-19     | 0.335           | 0.055           | 0.258       | 0.007              | 23.21   |
|                 |              | Non-Covid-19 | 0.335           | 0.055           | 0.383       | 0.014              | -14.181 |
|                 | Last         | All          | 0.309           | 0.038           | 0.23        | 0.005              | 25.789  |
|                 |              | COVID-19     | 0.309           | 0.038           | 0.215       | 0.007              | 30.678  |
|                 |              | Non-Covid-19 | 0.309           | 0.038           | 0.267       | 0.011              | 13.79   |
|                 | Any          | All          | 0.376           | 0.016           | 0.348       | 0.005              | 7.519   |
|                 |              | COVID-19     | 0.376           | 0.016           | 0.336       | 0.007              | 10.794  |
|                 |              | Non-Covid-19 | 0.376           | 0.016           | 0.371       | 0.004              | 1.385   |
|                 | Solo         | All          | -               | -               | 0.145       | 0.025              | -       |
|                 |              | COVID-19     | -               | -               | 0.114       | 0.013              | -       |
|                 |              | Non-Covid-19 | -               | -               | 0.269       | 0.031              | -       |
| Springer-Nature | First        | All          | 0.458           | 0.011           | 0.438       | 0.014              | 4.33    |
|                 |              | COVID-19     | 0.458           | 0.011           | 0.435       | 0.04               | 4.949   |
|                 |              | Non-Covid-19 | 0.458           | 0.011           | 0.431       | 0.014              | 5.847   |
|                 | Last         | All          | 0.315           | 0.008           | 0.275       | 0.011              | 12.537  |
|                 |              | COVID-19     | 0.315           | 0.008           | 0.295       | 0.036              | 6.372   |
|                 |              | Non-Covid-19 | 0.315           | 0.008           | 0.275       | 0.012              | 12.477  |
|                 | Any          | All          | 0.39            | 0.006           | 0.382       | 0.007              | 1.997   |
|                 |              | COVID-19     | 0.39            | 0.006           | 0.37        | 0.032              | 5.022   |
|                 |              | Non-Covid-19 | 0.39            | 0.006           | 0.374       | 0.009              | 4.131   |
|                 | Solo         | All          | 0.284           | 0.04            | 0.299       | 0.029              | -5.149  |
|                 |              | COVID-19     | 0.284           | 0.04            | -           | -                  | -       |
|                 |              | Non-Covid-19 | 0.284           | 0.04            | 0.362       | 0.04               | -27.352 |

$\bar{y}_{est}$  is the arithmetic mean of the estimate,  $\bar{y}$  is the arithmetic mean of the observation

$\bar{S}_{est}$  is the mean standard error of the estimate

$\sigma_{\bar{x}}$  is the standard error of the mean (SEM) of the observation

$p > 0.05$  for all baseline models – no significant temporal trend observed

**Table S4. The expected and observed number of authors**

|        | Model                |                      | Observation    |                         | % diff |
|--------|----------------------|----------------------|----------------|-------------------------|--------|
|        | $\sum \bar{y}_{est}$ | $\sum \bar{S}_{est}$ | $\sum \bar{y}$ | $\sum \sigma_{\bar{x}}$ |        |
| All    | 124710.526           | 176627               | 4460.152       | 257.515                 | 41.630 |
| Female | 44182.437            | 61528                | 1605.054       | 91.687                  | 39.259 |
| Male   | 80528.089            | 115099               | 2897.689       | 168.291                 | 42.930 |

$\bar{y}_{est}$  is the arithmetic mean of the estimate

$\bar{y}$  is the arithmetic mean of the observation

$\bar{S}_{est}$  is the mean standard error of the estimate

$\sigma_{\bar{x}}$  is the standard error of the mean (SEM) of the observation

$p < 0.05$  for all baseline models

**Table S5. The expected and observed number of papers**

|                 | Model                |                      | Observation    |                         | % diff  |
|-----------------|----------------------|----------------------|----------------|-------------------------|---------|
|                 | $\sum \bar{y}_{est}$ | $\sum \bar{S}_{est}$ | $\sum \bar{y}$ | $\sum \sigma_{\bar{x}}$ |         |
| All             | 19706.087            | 25867                | 658.846        | 35.692                  | 31.264  |
| medRxiv         | 2165.893             | 7244                 | 198.779        | 22.482                  | 234.458 |
| bioRxiv         | 13156.660            | 16634                | 495.626        | 22.691                  | 26.430  |
| Springer-Nature | 4770.883             | 1991                 | 195.950        | 15.270                  | -58.268 |

$\bar{y}_{est}$  is the arithmetic mean of the estimate

$\bar{y}$  is the arithmetic mean of the observation

$\bar{S}_{est}$  is the mean standard error of the estimate

$\sigma_{\bar{x}}$  is the standard error of the mean (SEM) of the observation

$p < 0.05$  for all baseline models

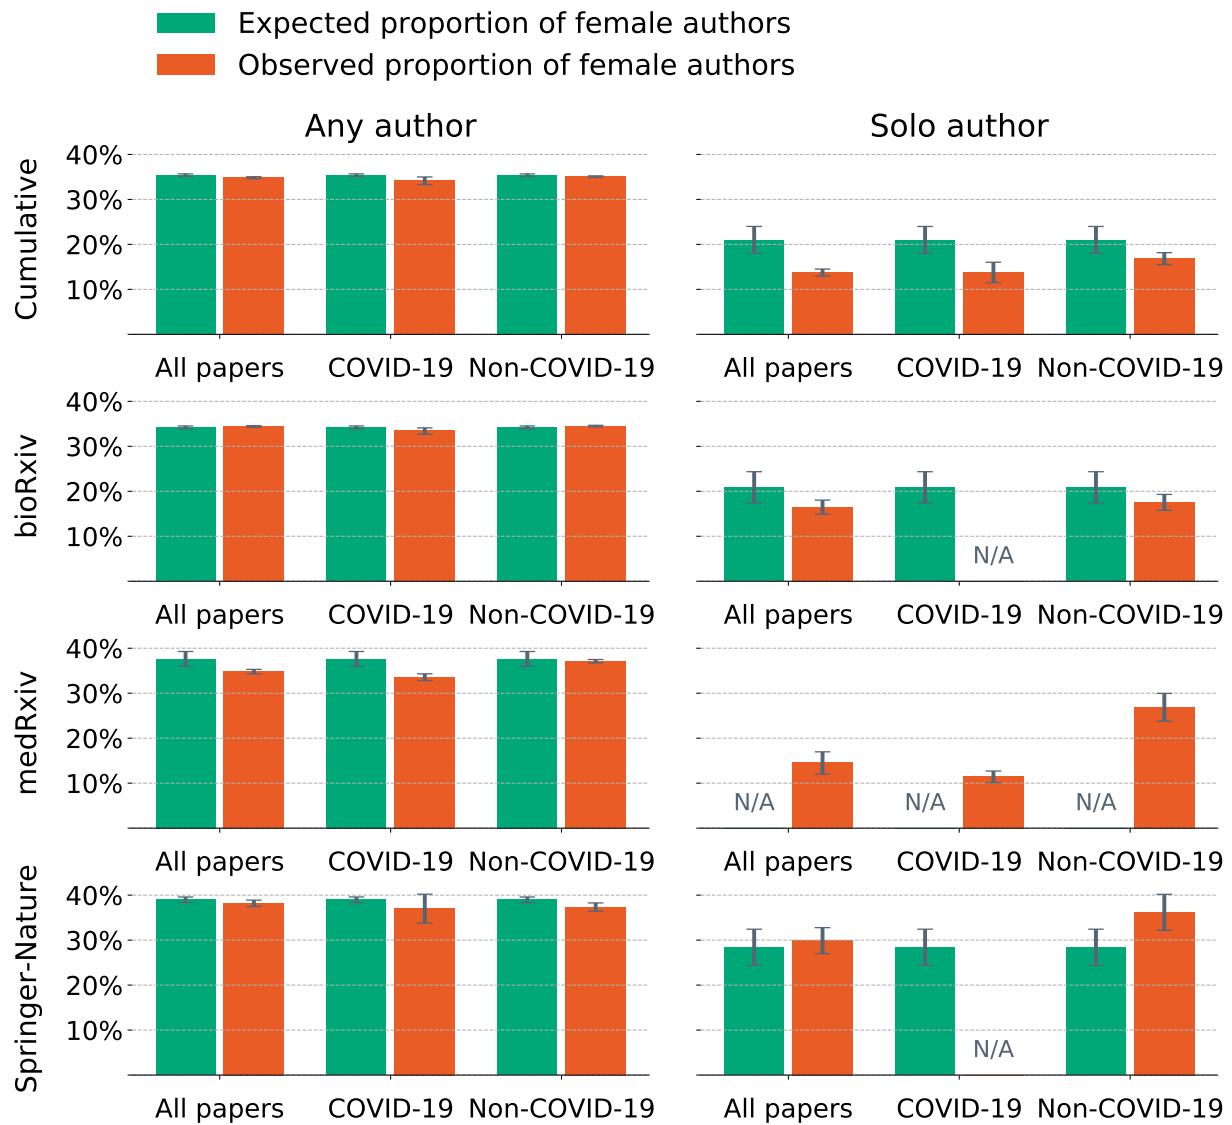

**Fig. S2. The comparison of the expected and observed proportion of female authors that publish during the COVID-19 pandemic.** Green bars represent the expected proportion of female authors, estimated by the OLS model from the historical data from 2019. Orange bars are the observed proportion of female authors that publish during the COVID-19 pandemic. The papers are divided by the topic in three groups: 1) all papers from the dataset, 2) the papers that deal directly with the COVID-19 and related topics, 3) the papers that are not about COVID-19 or related topics. In the first row are the results from all publishers combined. Other rows represent the results for each publisher separately. Missing bars indicate insufficient number of samples.



**Table S6. The optimal cut-off point for RDD design**

|                | <i>W</i> | $\tau$ | <i>p</i>     | <i>st.err</i> |
|----------------|----------|--------|--------------|---------------|
| Australia      | -13      | -0.156 | 0.345        | 0.162         |
| Brazil         | 0        | -0.331 | <b>0.007</b> | 0.112         |
| Canada         | 4        | -0.179 | <b>0.013</b> | 0.068         |
| Switzerland    | -13      | -0.242 | 0.209        | 0.188         |
| China          | 14       | -0.110 | <b>0.009</b> | 0.040         |
| Germany        | 2        | -0.162 | <b>0.011</b> | 0.061         |
| Spain          | 1        | -0.247 | <b>0.040</b> | 0.115         |
| France         | 1        | -0.255 | <b>0.000</b> | 0.066         |
| United Kingdom | 1        | -0.151 | <b>0.001</b> | 0.041         |
| India          | 2        | -0.120 | 0.103        | 0.072         |
| Italy          | 3        | -0.264 | <b>0.006</b> | 0.092         |
| Japan          | -2       | -0.137 | 0.140        | 0.089         |
| Netherlands    | 17       | -0.229 | 0.117        | 0.143         |
| Sweden         | 0        | -0.240 | 0.118        | 0.142         |
| United States  | 2        | -0.120 | <b>0.000</b> | 0.029         |

*W* – number of weeks after Jan 31<sup>st</sup> 2020

**Table S7. The trends of the proportion of female authors during the pandemic**

|                     | First author |         | Last author |         | All authors |         | Solo author |        |
|---------------------|--------------|---------|-------------|---------|-------------|---------|-------------|--------|
|                     | $\beta$      | $p$     | $\beta$     | $p$     | $\beta$     | $p$     | $\beta$     | $p$    |
| All papers          |              |         |             |         |             |         |             |        |
| bioRxiv             | -0.001       | 0.233   | 0.002       | 0.0***  | 0.001       | 0.015*  | 0.006       | 0.023* |
| medRxiv             | 0.002        | 0.053   | 0.002       | 0.009** | 0.003       | 0.0***  | -0.005      | 0.087  |
| Springer-Nature     | -0.003       | 0.388   | -0.000      | 0.946   | 0.003       | 0.013*  | -0.043      | 0.243  |
| All                 | -0.002       | 0.083   | 0.002       | 0.002** | 0.001       | 0.0***  | 0.000       | 0.999  |
| COVID-19 papers     |              |         |             |         |             |         |             |        |
| bioRxiv             | -0.002       | 0.449   | 0.003       | 0.254   | 0.003       | 0.008** | -0.167      | –      |
| medRxiv             | 0.004        | 0.002** | 0.004       | 0.0***  | 0.005       | 0.0***  | -0.006      | 0.058  |
| Springer-Nature     | -0.002       | 0.809   | 0.019       | 0.053   | 0.016       | 0.003** | –           | –      |
| All                 | 0.001        | 0.278   | 0.003       | 0.0***  | 0.005       | 0.0***  | -0.005      | 0.119  |
| Non-COVID-19 papers |              |         |             |         |             |         |             |        |
| bioRxiv             | -0.001       | 0.301   | 0.002       | 0.0***  | 0.001       | 0.042*  | 0.006       | 0.047* |
| medRxiv             | 0.002        | 0.399   | -0.001      | 0.513   | 0.000       | 0.618   | -0.009      | 0.617  |
| Springer-Nature     | -0.005       | 0.157   | -0.000      | 0.861   | 0.000       | 0.844   | -0.038      | 0.46   |
| All                 | -0.002       | 0.024*  | 0.001       | 0.025*  | 0.000       | 0.169   | 0.004       | 0.132  |

$\beta$  - a slope of the linear regression model  $f_i = \alpha + \beta t + \epsilon_i$ , where  $t$  is the time in weeks after mid March 2020

$p$  -  $p$ -value

\* -  $p < 0.05$ , \*\* -  $p < 0.01$ , \*\*\* -  $p < 0.001$

**Table S8. The expected and observed proportion of female FIRST authors across the countries and disaggregated by the publisher**

| All publishers |                 |                 |             |                    |         |                 |                 |             |                    |         |
|----------------|-----------------|-----------------|-------------|--------------------|---------|-----------------|-----------------|-------------|--------------------|---------|
|                | All papers      |                 |             |                    |         | COVID-19 papers |                 |             |                    |         |
|                | Model           |                 | Observation |                    |         | Model           |                 | Observation |                    |         |
|                | $\bar{y}_{est}$ | $\bar{S}_{est}$ | $\bar{y}$   | $\sigma_{\bar{x}}$ | % diff  | $\bar{y}_{est}$ | $\bar{S}_{est}$ | $\bar{y}$   | $\sigma_{\bar{x}}$ | % diff  |
| Australia      | 0.403           | 0.033           | 0.381       | 0.020              | -5.412  | 0.403           | 0.033           | 0.365       | 0.038              | -9.47   |
| Brazil         | -               | -               | 0.383       | 0.028              | -       | -               | -               | 0.3         | 0.03               | -       |
| Canada         | 0.462           | 0.03            | 0.371       | 0.020              | -19.717 | 0.462           | 0.03            | 0.336       | 0.034              | -27.248 |
| China          | 0.302           | 0.019           | 0.302       | 0.018              | -0.088  | 0.302           | 0.019           | 0.271       | 0.023              | -10.364 |
| France         | 0.466           | 0.03            | 0.414       | 0.017              | -11.085 | 0.466           | 0.03            | 0.33        | 0.024              | -29.309 |
| Germany        | 0.393           | 0.02            | 0.360       | 0.013              | -8.595  | 0.393           | 0.02            | 0.252       | 0.027              | -36.01  |
| India          | 0.365           | 0.037           | 0.316       | 0.024              | -13.404 | 0.365           | 0.037           | 0.238       | 0.025              | -34.696 |
| Italy          | 0.526           | 0.046           | 0.395       | 0.024              | -24.931 | 0.526           | 0.046           | 0.391       | 0.033              | -25.583 |
| Japan          | 0.223           | 0.028           | 0.191       | 0.019              | -14.558 | 0.223           | 0.028           | 0.276       | 0.03               | 23.735  |
| Netherlands    | 0.435           | 0.035           | 0.448       | 0.026              | 3.153   | 0.435           | 0.035           | 0.397       | 0.034              | -8.625  |
| Spain          | 0.361           | 0.043           | 0.367       | 0.031              | 1.616   | 0.361           | 0.043           | 0.255       | 0.032              | -29.317 |
| Sweden         | 0.494           | 0.046           | 0.415       | 0.035              | -15.954 | 0.494           | 0.046           | -           | -                  | -       |
| Switzerland    | 0.467           | 0.048           | 0.430       | 0.027              | -7.864  | 0.467           | 0.048           | 0.402       | 0.036              | -13.972 |
| United Kingdom | 0.402           | 0.02            | 0.387       | 0.011              | -3.803  | 0.402           | 0.02            | 0.293       | 0.016              | -27.175 |
| United States  | 0.364           | 0.011           | 0.346       | 0.006              | -4.899  | 0.364           | 0.011           | 0.294       | 0.017              | -19.283 |

  

| bioRxiv and medRxiv |                 |                 |             |                    |         |                 |                 |             |                    |         |
|---------------------|-----------------|-----------------|-------------|--------------------|---------|-----------------|-----------------|-------------|--------------------|---------|
|                     | All papers      |                 |             |                    |         | COVID-19 papers |                 |             |                    |         |
|                     | Model           |                 | Observation |                    |         | Model           |                 | Observation |                    |         |
|                     | $\bar{y}_{est}$ | $\bar{S}_{est}$ | $\bar{y}$   | $\sigma_{\bar{x}}$ | % diff  | $\bar{y}_{est}$ | $\bar{S}_{est}$ | $\bar{y}$   | $\sigma_{\bar{x}}$ | % diff  |
| Australia           | 0.361           | 0.039           | 0.357       | 0.027              | -1.185  | 0.361           | 0.039           | 0.354       | 0.039              | -2.122  |
| Brazil              | -               | -               | 0.344       | 0.025              | -       | -               | -               | 0.292       | 0.031              | -       |
| Canada              | 0.434           | 0.037           | 0.352       | 0.021              | -18.791 | 0.434           | 0.037           | 0.327       | 0.033              | -24.582 |
| China               | 0.262           | 0.038           | 0.290       | 0.020              | 10.689  | 0.262           | 0.038           | 0.271       | 0.024              | 3.512   |
| France              | 0.469           | 0.034           | 0.417       | 0.019              | -11.216 | 0.469           | 0.034           | 0.329       | 0.025              | -29.943 |
| Germany             | 0.36            | 0.023           | 0.360       | 0.015              | -0.059  | 0.36            | 0.023           | 0.247       | 0.028              | -31.297 |
| India               | 0.393           | 0.04            | 0.313       | 0.024              | -20.396 | 0.393           | 0.04            | 0.239       | 0.025              | -39.249 |
| Italy               | 0.471           | 0.048           | 0.368       | 0.024              | -21.978 | 0.471           | 0.048           | 0.399       | 0.032              | -15.374 |
| Japan               | 0.229           | 0.038           | 0.199       | 0.021              | -13.289 | 0.229           | 0.038           | 0.276       | 0.03               | 20.259  |
| Netherlands         | 0.346           | 0.047           | 0.428       | 0.028              | 23.725  | 0.346           | 0.047           | 0.405       | 0.034              | 16.964  |
| Spain               | 0.383           | 0.051           | 0.355       | 0.031              | -7.185  | 0.383           | 0.051           | 0.256       | 0.032              | -33.112 |
| Sweden              | -               | -               | 0.393       | 0.034              | -       | -               | -               | -           | -                  | -       |
| Switzerland         | 0.463           | 0.051           | 0.415       | 0.027              | -10.422 | 0.463           | 0.051           | 0.395       | 0.038              | -14.625 |
| United Kingdom      | 0.39            | 0.024           | 0.385       | 0.011              | -1.146  | 0.39            | 0.024           | 0.289       | 0.015              | -25.96  |
| United States       | 0.354           | 0.011           | 0.342       | 0.007              | -3.617  | 0.354           | 0.011           | 0.275       | 0.013              | -22.324 |

  

| Springer-Nature |                 |                 |             |                    |         |                 |                 |             |                    |        |
|-----------------|-----------------|-----------------|-------------|--------------------|---------|-----------------|-----------------|-------------|--------------------|--------|
|                 | All papers      |                 |             |                    |         | COVID-19 papers |                 |             |                    |        |
|                 | Model           |                 | Observation |                    |         | Model           |                 | Observation |                    |        |
|                 | $\bar{y}_{est}$ | $\bar{S}_{est}$ | $\bar{y}$   | $\sigma_{\bar{x}}$ | % diff  | $\bar{y}_{est}$ | $\bar{S}_{est}$ | $\bar{y}$   | $\sigma_{\bar{x}}$ | % diff |
| Australia       | 0.491           | 0.053           | 0.465       | 0.039              | -5.238  | 0.491           | 0.053           | -           | -                  | -      |
| Brazil          | -               | -               | -           | -                  | -       | -               | -               | -           | -                  | -      |
| Canada          | 0.576           | 0.05            | 0.563       | 0.045              | -2.229  | 0.576           | 0.05            | -           | -                  | -      |
| China           | 0.343           | 0.021           | 0.32        | 0.02               | -6.914  | 0.343           | 0.021           | 0.405       | 0.055              | 17.835 |
| France          | -               | -               | -           | -                  | -       | -               | -               | -           | -                  | -      |
| Germany         | 0.526           | 0.041           | 0.39        | 0.028              | -25.724 | 0.526           | 0.041           | -           | -                  | -      |
| India           | -               | -               | -           | -                  | -       | -               | -               | -           | -                  | -      |
| Italy           | 0.498           | 0.045           | 0.508       | 0.042              | 2.043   | 0.498           | 0.045           | -           | -                  | -      |
| Japan           | 0.257           | 0.032           | 0.319       | 0.035              | 24.171  | 0.257           | 0.032           | -           | -                  | -      |
| Netherlands     | -               | -               | -           | -                  | -       | -               | -               | -           | -                  | -      |
| Spain           | -               | -               | 0.472       | 0.027              | -       | -               | -               | -           | -                  | -      |
| Sweden          | 0.578           | 0.05            | 0.507       | 0.01               | -12.381 | 0.578           | 0.05            | -           | -                  | -      |
| Switzerland     | -               | -               | -           | -                  | -       | -               | -               | -           | -                  | -      |
| United Kingdom  | 0.487           | 0.041           | 0.486       | 0.03               | -0.157  | 0.487           | 0.041           | -           | -                  | -      |
| United States   | 0.486           | 0.03            | 0.455       | 0.035              | -6.363  | 0.486           | 0.03            | -           | -                  | -      |

$\bar{y}_{est}$  is the arithmetic mean of the estimate, and  $\bar{y}$  is the arithmetic mean of the observation  
 $\bar{S}_{est}$  is the mean standard error of the estimate  
 $\sigma_{\bar{x}}$  is the standard error of the mean (SEM) of the observation

**Table S9. The expected and observed proportion of female LAST authors across the countries and disaggregated by the publisher**

|                | All publishers  |           |             |                    |         |                 |           |             |                    |         |
|----------------|-----------------|-----------|-------------|--------------------|---------|-----------------|-----------|-------------|--------------------|---------|
|                | All papers      |           |             |                    |         | COVID-19 papers |           |             |                    |         |
|                | Model           |           | Observation |                    |         | Model           |           | Observation |                    |         |
|                | $\bar{y}_{est}$ | $S_{est}$ | $\bar{y}$   | $\sigma_{\bar{x}}$ | % diff  | $\bar{y}_{est}$ | $S_{est}$ | $\bar{y}$   | $\sigma_{\bar{x}}$ | % diff  |
| Australia      | 0.324           | 0.03      | 0.257       | 0.018              | -20.68  | 0.324           | 0.03      | 0.311       | 0.033              | -4.057  |
| Brazil         | -               | -         | 0.268       | 0.025              | -       | -               | -         | 0.196       | 0.024              | -       |
| Canada         | 0.312           | 0.029     | 0.283       | 0.014              | -9.424  | 0.312           | 0.029     | 0.271       | 0.036              | -13.09  |
| China          | 0.209           | 0.014     | 0.207       | 0.009              | -0.966  | 0.209           | 0.014     | 0.191       | 0.015              | -8.531  |
| France         | 0.31            | 0.024     | 0.291       | 0.013              | -6.103  | 0.31            | 0.024     | 0.242       | 0.026              | -22.11  |
| Germany        | 0.247           | 0.021     | 0.207       | 0.011              | -16.15  | 0.247           | 0.021     | 0.18        | 0.02               | -27.098 |
| India          | 0.253           | 0.026     | 0.220       | 0.014              | -13.239 | 0.253           | 0.026     | 0.225       | 0.024              | -11.154 |
| Italy          | 0.362           | 0.042     | 0.262       | 0.020              | -27.589 | 0.362           | 0.042     | 0.28        | 0.026              | -22.81  |
| Japan          | 0.129           | 0.018     | 0.081       | 0.007              | -37.369 | 0.129           | 0.018     | -           | -                  | -       |
| Netherlands    | 0.273           | 0.031     | 0.269       | 0.024              | -1.337  | 0.273           | 0.031     | 0.38        | 0.037              | 39.323  |
| Spain          | 0.301           | 0.036     | 0.237       | 0.020              | -21.426 | 0.301           | 0.036     | 0.24        | 0.024              | -20.388 |
| Sweden         | 0.338           | 0.04      | 0.325       | 0.026              | -3.958  | 0.338           | 0.04      | 0.39        | 0.036              | 15.172  |
| Switzerland    | 0.256           | 0.038     | 0.203       | 0.016              | -20.816 | 0.256           | 0.038     | 0.322       | 0.034              | 25.712  |
| United Kingdom | 0.284           | 0.016     | 0.246       | 0.007              | -13.383 | 0.284           | 0.016     | 0.233       | 0.016              | -18.131 |
| United States  | 0.245           | 0.009     | 0.240       | 0.006              | -2.014  | 0.245           | 0.009     | 0.219       | 0.011              | -10.394 |

  

|                | bioRxiv and medRxiv |           |             |                    |         |                 |           |             |                    |         |
|----------------|---------------------|-----------|-------------|--------------------|---------|-----------------|-----------|-------------|--------------------|---------|
|                | All papers          |           |             |                    |         | COVID-19 papers |           |             |                    |         |
|                | Model               |           | Observation |                    |         | Model           |           | Observation |                    |         |
|                | $\bar{y}_{est}$     | $S_{est}$ | $\bar{y}$   | $\sigma_{\bar{x}}$ | % diff  | $\bar{y}_{est}$ | $S_{est}$ | $\bar{y}$   | $\sigma_{\bar{x}}$ | % diff  |
| Australia      | 0.271               | 0.029     | 0.233       | 0.017              | -14.054 | 0.271           | 0.029     | 0.313       | 0.032              | 15.653  |
| Brazil         | -                   | -         | 0.246       | 0.019              | -       | -               | -         | 0.196       | 0.024              | -       |
| Canada         | -                   | -         | 0.270       | 0.015              | -       | -               | -         | 0.277       | 0.036              | -       |
| China          | 0.209               | 0.026     | 0.207       | 0.011              | -0.81   | 0.209           | 0.026     | 0.195       | 0.016              | -6.828  |
| France         | 0.319               | 0.027     | 0.289       | 0.014              | -9.352  | 0.319           | 0.027     | 0.237       | 0.026              | -25.55  |
| Germany        | 0.23                | 0.025     | 0.204       | 0.012              | -11.466 | 0.23            | 0.025     | 0.184       | 0.022              | -20.226 |
| India          | 0.241               | 0.028     | 0.219       | 0.015              | -9.467  | 0.241           | 0.028     | 0.223       | 0.024              | -7.6    |
| Italy          | 0.351               | 0.048     | 0.252       | 0.021              | -28.28  | 0.351           | 0.048     | 0.276       | 0.026              | -21.392 |
| Japan          | -                   | -         | 0.085       | 0.008              | -       | -               | -         | -           | -                  | -       |
| Netherlands    | -                   | -         | 0.261       | 0.024              | -       | -               | -         | 0.376       | 0.036              | -       |
| Spain          | 0.261               | 0.031     | 0.233       | 0.018              | -10.741 | 0.261           | 0.031     | 0.234       | 0.021              | -10.346 |
| Sweden         | -                   | -         | 0.294       | 0.027              | -       | -               | -         | 0.417       | 0.035              | -       |
| Switzerland    | -                   | -         | 0.202       | 0.017              | -       | -               | -         | 0.333       | 0.035              | -       |
| United Kingdom | 0.259               | 0.019     | 0.240       | 0.007              | -7.423  | 0.259           | 0.019     | 0.23        | 0.014              | -11.247 |
| United States  | 0.239               | 0.01      | 0.237       | 0.006              | -0.658  | 0.239           | 0.01      | 0.218       | 0.011              | -8.53   |

  

|                | Springer-Nature |           |             |                    |         |                 |           |             |                    |        |
|----------------|-----------------|-----------|-------------|--------------------|---------|-----------------|-----------|-------------|--------------------|--------|
|                | All papers      |           |             |                    |         | COVID-19 papers |           |             |                    |        |
|                | Model           |           | Observation |                    |         | Model           |           | Observation |                    |        |
|                | $\bar{y}_{est}$ | $S_{est}$ | $\bar{y}$   | $\sigma_{\bar{x}}$ | % diff  | $\bar{y}_{est}$ | $S_{est}$ | $\bar{y}$   | $\sigma_{\bar{x}}$ | % diff |
| Australia      | 0.456           | 0.047     | 0.427       | 0.031              | -6.394  | 0.456           | 0.047     | -           | -                  | -      |
| Brazil         | -               | -         | -           | -                  | -       | -               | -         | -           | -                  | -      |
| Canada         | 0.473           | 0.044     | 0.439       | 0.039              | -7.262  | 0.473           | 0.044     | -           | -                  | -      |
| China          | 0.219           | 0.014     | 0.212       | 0.015              | -3.314  | 0.219           | 0.014     | -           | -                  | -      |
| France         | -               | -         | -           | -                  | -       | -               | -         | -           | -                  | -      |
| Germany        | -               | -         | 0.262       | 0.018              | -       | -               | -         | -           | -                  | -      |
| India          | -               | -         | -           | -                  | -       | -               | -         | -           | -                  | -      |
| Italy          | 0.529           | 0.047     | 0.334       | 0.025              | -36.754 | 0.529           | 0.047     | -           | -                  | -      |
| Japan          | 0.134           | 0.019     | 0.211       | 0.031              | 57.366  | 0.134           | 0.019     | -           | -                  | -      |
| Netherlands    | -               | -         | 0.355       | 0.037              | -       | -               | -         | -           | -                  | -      |
| Spain          | -               | -         | -           | -                  | -       | -               | -         | -           | -                  | -      |
| Sweden         | 0.581           | 0.049     | 0.53        | 0.032              | -8.862  | 0.581           | 0.049     | -           | -                  | -      |
| Switzerland    | -               | -         | -           | -                  | -       | -               | -         | -           | -                  | -      |
| United Kingdom | 0.419           | 0.038     | 0.365       | 0.035              | -12.856 | 0.419           | 0.038     | -           | -                  | -      |
| United States  | 0.349           | 0.029     | 0.349       | 0.021              | -0.107  | 0.349           | 0.029     | -           | -                  | -      |

$\bar{y}_{est}$  is the arithmetic mean of the estimate, and  $\bar{y}$  is the arithmetic mean of the observation

$S_{est}$  is the mean standard error of the estimate

$\sigma_{\bar{x}}$  is the standard error of the mean (SEM) of the observation

**Table S10. The expected and observed proportion of female authors REGARDLESS Of THE ORDER across the countries and disaggregated by the publisher**

|                | All publishers  |                 |             |                    |         |                 |                 |             |                    |         |
|----------------|-----------------|-----------------|-------------|--------------------|---------|-----------------|-----------------|-------------|--------------------|---------|
|                | All papers      |                 |             |                    |         | COVID-19 papers |                 |             |                    |         |
|                | Model           |                 | Observation |                    |         | Model           |                 | Observation |                    |         |
|                | $\bar{y}_{est}$ | $\bar{S}_{est}$ | $\bar{y}$   | $\sigma_{\bar{x}}$ | % diff  | $\bar{y}_{est}$ | $\bar{S}_{est}$ | $\bar{y}$   | $\sigma_{\bar{x}}$ | % diff  |
| Australia      | 0.383           | 0.018           | 0.367       | 0.006              | -4.360  | 0.383           | 0.018           | 0.371       | 0.024              | -3.127  |
| Brazil         | 0.457           | 0.022           | 0.399       | 0.015              | -12.852 | 0.457           | 0.022           | 0.326       | 0.024              | -28.644 |
| Canada         | 0.378           | 0.014           | 0.354       | 0.007              | -6.438  | 0.378           | 0.014           | 0.318       | 0.018              | -15.782 |
| China          | 0.270           | 0.009           | 0.278       | 0.004              | 2.657   | 0.270           | 0.009           | 0.277       | 0.009              | 2.483   |
| France         | 0.410           | 0.012           | 0.404       | 0.005              | -1.479  | 0.410           | 0.012           | 0.367       | 0.021              | -10.441 |
| Germany        | 0.347           | 0.009           | 0.331       | 0.005              | -4.495  | 0.347           | 0.009           | 0.301       | 0.012              | -13.117 |
| India          | 0.310           | 0.017           | 0.306       | 0.010              | -1.425  | 0.310           | 0.017           | 0.303       | 0.019              | -2.287  |
| Italy          | 0.440           | 0.021           | 0.414       | 0.009              | -5.786  | 0.440           | 0.021           | 0.382       | 0.024              | -13.093 |
| Japan          | 0.155           | 0.010           | 0.177       | 0.006              | 13.697  | 0.155           | 0.010           | 0.165       | 0.016              | 6.079   |
| Netherlands    | 0.373           | 0.014           | 0.376       | 0.010              | 0.876   | 0.373           | 0.014           | 0.339       | 0.025              | -9.127  |
| Spain          | 0.411           | 0.015           | 0.413       | 0.010              | 0.545   | 0.411           | 0.015           | 0.394       | 0.023              | -4.120  |
| Sweden         | 0.402           | 0.021           | 0.360       | 0.011              | -10.394 | 0.402           | 0.021           | 0.321       | 0.020              | -20.059 |
| Switzerland    | 0.351           | 0.020           | 0.360       | 0.011              | 2.425   | 0.351           | 0.020           | 0.330       | 0.025              | -6.078  |
| United Kingdom | 0.384           | 0.008           | 0.362       | 0.004              | -5.629  | 0.384           | 0.008           | 0.351       | 0.012              | -8.695  |
| United States  | 0.350           | 0.006           | 0.349       | 0.004              | -0.194  | 0.350           | 0.006           | 0.350       | 0.012              | 0.064   |

  

|                | bioRxiv and medRxiv |                 |             |                    |        |                 |                 |             |                    |         |
|----------------|---------------------|-----------------|-------------|--------------------|--------|-----------------|-----------------|-------------|--------------------|---------|
|                | All papers          |                 |             |                    |        | COVID-19 papers |                 |             |                    |         |
|                | Model               |                 | Observation |                    |        | Model           |                 | Observation |                    |         |
|                | $\bar{y}_{est}$     | $\bar{S}_{est}$ | $\bar{y}$   | $\sigma_{\bar{x}}$ | % diff | $\bar{y}_{est}$ | $\bar{S}_{est}$ | $\bar{y}$   | $\sigma_{\bar{x}}$ | % diff  |
| Australia      | 0.357               | 0.019           | 0.351       | 0.009              | -1.701 | 0.357           | 0.019           | 0.359       | 0.025              | 0.733   |
| Brazil         | 0.417               | 0.026           | 0.385       | 0.015              | -7.662 | 0.417           | 0.026           | 0.324       | 0.024              | -22.330 |
| Canada         | 0.350               | 0.017           | 0.342       | 0.008              | -2.131 | 0.350           | 0.017           | 0.314       | 0.019              | -10.086 |
| China          | 0.263               | 0.012           | 0.281       | 0.006              | 6.663  | 0.263           | 0.012           | 0.282       | 0.010              | 6.983   |
| France         | 0.414               | 0.014           | 0.404       | 0.005              | -2.505 | 0.414           | 0.014           | 0.368       | 0.021              | -11.164 |
| Germany        | 0.338               | 0.011           | 0.331       | 0.005              | -1.812 | 0.338           | 0.011           | 0.299       | 0.012              | -11.472 |
| India          | 0.328               | 0.018           | 0.305       | 0.010              | -6.935 | 0.328           | 0.018           | 0.303       | 0.019              | -7.499  |
| Italy          | 0.419               | 0.028           | 0.407       | 0.011              | -2.804 | 0.419           | 0.028           | 0.375       | 0.026              | -10.529 |
| Japan          | 0.171               | 0.016           | 0.182       | 0.008              | 6.554  | 0.171           | 0.016           | 0.164       | 0.017              | -4.245  |
| Netherlands    | 0.342               | 0.016           | 0.370       | 0.009              | 7.929  | 0.342           | 0.016           | 0.341       | 0.025              | -0.378  |
| Spain          | 0.405               | 0.019           | 0.410       | 0.011              | 1.246  | 0.405           | 0.019           | 0.392       | 0.024              | -3.370  |
| Sweden         | 0.356               | 0.026           | 0.347       | 0.012              | -2.674 | 0.356           | 0.026           | 0.319       | 0.021              | -10.404 |
| Switzerland    | 0.334               | 0.021           | 0.355       | 0.011              | 6.241  | 0.334           | 0.021           | 0.323       | 0.024              | -3.264  |
| United Kingdom | 0.366               | 0.010           | 0.360       | 0.004              | -1.787 | 0.366           | 0.010           | 0.346       | 0.012              | -5.625  |
| United States  | 0.341               | 0.005           | 0.344       | 0.003              | 1.030  | 0.341           | 0.005           | 0.345       | 0.009              | 1.059   |

  

|                | Springer-Nature |                 |             |                    |         |                 |                 |             |                    |         |
|----------------|-----------------|-----------------|-------------|--------------------|---------|-----------------|-----------------|-------------|--------------------|---------|
|                | All papers      |                 |             |                    |         | COVID-19 papers |                 |             |                    |         |
|                | Model           |                 | Observation |                    |         | Model           |                 | Observation |                    |         |
|                | $\bar{y}_{est}$ | $\bar{S}_{est}$ | $\bar{y}$   | $\sigma_{\bar{x}}$ | % diff  | $\bar{y}_{est}$ | $\bar{S}_{est}$ | $\bar{y}$   | $\sigma_{\bar{x}}$ | % diff  |
| Australia      | 0.469           | 0.03            | 0.492       | 0.033              | 4.921   | 0.469           | 0.03            | -           | -                  | -       |
| Brazil         | 0.528           | 0.036           | 0.523       | 0.041              | -0.917  | 0.528           | 0.036           | -           | -                  | -       |
| Canada         | 0.504           | 0.024           | 0.541       | 0.034              | 7.477   | 0.504           | 0.024           | -           | -                  | -       |
| China          | 0.28            | 0.01            | 0.241       | 0.012              | -13.679 | 0.28            | 0.01            | 0.215       | 0.027              | -23.235 |
| France         | 0.405           | 0.025           | 0.349       | 0.041              | -14.045 | 0.405           | 0.025           | -           | -                  | -       |
| Germany        | 0.381           | 0.025           | 0.356       | 0.022              | -6.539  | 0.381           | 0.025           | 0.371       | 0.036              | -2.705  |
| India          | 0.26            | 0.042           | 0.492       | 0.033              | 89.181  | 0.26            | 0.042           | -           | -                  | -       |
| Italy          | 0.483           | 0.028           | 0.415       | 0.026              | -14.185 | 0.483           | 0.028           | -           | -                  | -       |
| Japan          | 0.132           | 0.017           | 0.165       | 0.024              | 24.88   | 0.132           | 0.017           | -           | -                  | -       |
| Netherlands    | 0.477           | 0.034           | 0.471       | 0.029              | -1.239  | 0.477           | 0.034           | -           | -                  | -       |
| Spain          | 0.458           | 0.041           | 0.435       | 0.024              | -5.142  | 0.458           | 0.041           | -           | -                  | -       |
| Sweden         | 0.496           | 0.04            | 0.480       | 0.027              | -3.129  | 0.496           | 0.04            | -           | -                  | -       |
| Switzerland    | 0.421           | 0.042           | 0.449       | 0.031              | 6.429   | 0.421           | 0.042           | -           | -                  | -       |
| United Kingdom | 0.473           | 0.02            | 0.414       | 0.025              | -12.48  | 0.473           | 0.02            | 0.416       | 0.024              | -12.061 |
| United States  | 0.434           | 0.014           | 0.442       | 0.028              | 1.831   | 0.434           | 0.014           | 0.37        | 0.042              | -14.663 |

$\bar{y}_{est}$  is the arithmetic mean of the estimate, and  $\bar{y}$  is the arithmetic mean of the observation  
 $\bar{S}_{est}$  is the mean standard error of the estimate  
 $\sigma_{\bar{x}}$  is the standard error of the mean (SEM) of the observation

**Table S11. The list of countries with the largest number of authors and papers in the dataset**

| country code | Name                      | # authors | # papers |
|--------------|---------------------------|-----------|----------|
| US           | United States             | 111212    | 34880    |
| GB           | United Kingdom            | 33386     | 12113    |
| CN           | China                     | 22381     | 10439    |
| DE           | Germany                   | 21919     | 7816     |
| FR           | France                    | 16846     | 5715     |
| CA           | Canada                    | 13037     | 5226     |
| JP           | Japan                     | 12413     | 3752     |
| AU           | Australia                 | 10603     | 4224     |
| IT           | Italy                     | 8961      | 2862     |
| NL           | Netherlands               | 8877      | 3520     |
| ES           | Spain                     | 8063      | 2809     |
| IN           | India                     | 7598      | 3440     |
| CH           | Switzerland               | 6632      | 2863     |
| BR           | Brazil                    | 6582      | 1779     |
| SE           | Sweden                    | 5224      | 2226     |
| RU           | Russian Federation        | 3920      | 2066     |
| DK           | Denmark                   | 3478      | 1464     |
| NO           | Norway                    | 3019      | 1254     |
| KR           | Korea                     | 2997      | 1280     |
| BE           | Belgium                   | 2977      | 1210     |
| IR           | Iran, Islamic Republic Of | 2957      | 913      |
| AT           | Austria                   | 2695      | 1116     |
| IL           | Israel                    | 2485      | 1053     |
| PL           | Poland                    | 2136      | 839      |
| FI           | Finland                   | 2113      | 883      |
| ZA           | South Africa              | 1923      | 1017     |
| MX           | Mexico                    | 1853      | 742      |
| SG           | Singapore                 | 1665      | 756      |
| PT           | Portugal                  | 1516      | 631      |
| GR           | Greece                    | 1453      | 650      |
